# Supplementary material
Source: HighWire-hosted journal article supplement (https://cmajopen.ca/highwire/filestream/89781/field_highwire_adjunct_files/3/open-2022-0102-4-at.pdf)

## Appendix 4 Sensitivity analysis

1) Excluding patients newly diagnosed with breast cancer (n=49,541) -> Cohort n=271,994

| Parameters                                            | Surgery                                   | Chemotherapy                              | Radiation                                 | Untreated                                 |
|-------------------------------------------------------|-------------------------------------------|-------------------------------------------|-------------------------------------------|-------------------------------------------|
| Relative change in rate (pre-pandemic slope)          | 0.9997<br>(0.9996-0.9999)<br>p-value<0.01 | 1.0007<br>(1.0005-1.0008)<br>p-value<0.01 | 1.0004<br>(1.0003-1.0006)<br>p-value<0.01 | 0.9997<br>(0.9996-0.9998)<br>p-value<0.01 |
| Relative change in mean rate at the start of COVID-19 | 0.95<br>(0.899-0.998)<br>p-value=0.04     | 1.24<br>(1.17-1.31)<br>p-value<0.01       | 1.11<br>(1.05-1.18)<br>p-value<0.01       | 0.84<br>(0.79-0.89)<br>p-value<0.01       |
| Relative change in rate (further change in slope)     | 1.004<br>(1.001-1.006)<br>p-value<0.01    | 0.992<br>(0.989-0.995)<br>p-value<0.01    | 0.996<br>(0.994-0.999)<br>p-value<0.01    | 1.004<br>(1.001-1.007)<br>p-value<0.01    |

**Number of patients by first treatment received in 1 year after diagnosis, per 1000 cancer cases**

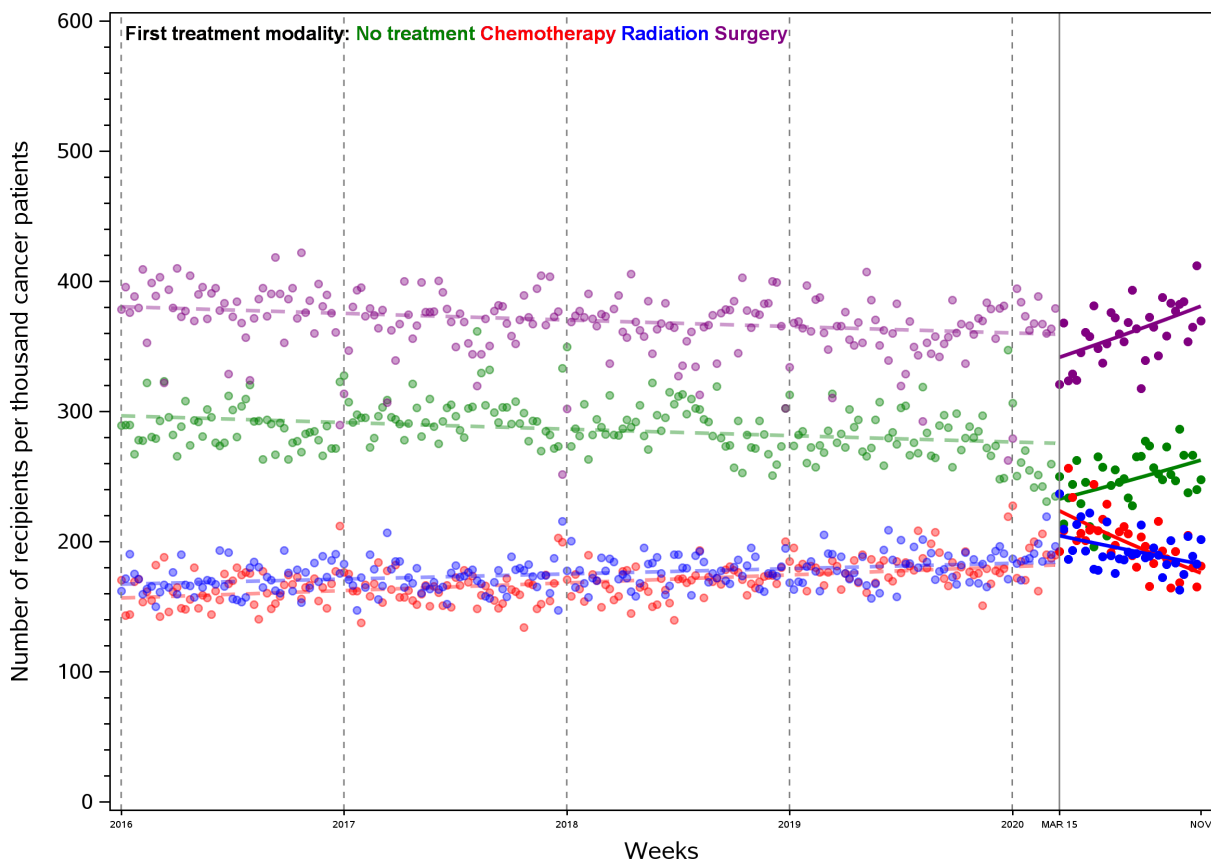

2) Excluding patients newly diagnosed with breast (n=49,541) or prostate (n=39,055) -> Cohort n=232,939

| Parameters                                            | Surgery                                     | Chemotherapy                              | Radiation                                 | Untreated                                 |
|-------------------------------------------------------|---------------------------------------------|-------------------------------------------|-------------------------------------------|-------------------------------------------|
| Relative change in rate (pre-pandemic slope)          | 0.9999<br>(0.99972-0.99999)<br>p-value=0.03 | 1.0006<br>(1.0004-1.0007)<br>p-value<0.01 | 1.0002<br>(1.0001-1.0004)<br>p-value<0.01 | 0.9997<br>(0.9995-0.9998)<br>p-value<0.01 |
| Relative change in mean rate at the start of COVID-19 | 0.94<br>(0.89-0.99)<br>p-value=0.02         | 1.20<br>(1.13-1.27)<br>p-value<0.01       | 1.15<br>(1.08-1.23)<br>p-value<0.01       | 0.85<br>(0.80-0.91)<br>p-value<0.01       |
| Relative change in rate (further change in slope)     | 1.004<br>(1.001-1.006)<br>p-value<0.01      | 0.993<br>(0.991-0.996)<br>p-value<0.01    | 0.996<br>(0.993-0.999)<br>p-value<0.01    | 1.003<br>(1.000-1.006)<br>p-value=0.02    |

Number of patients by first treatment received in 1 year after diagnosis, per 1000 cancer cases

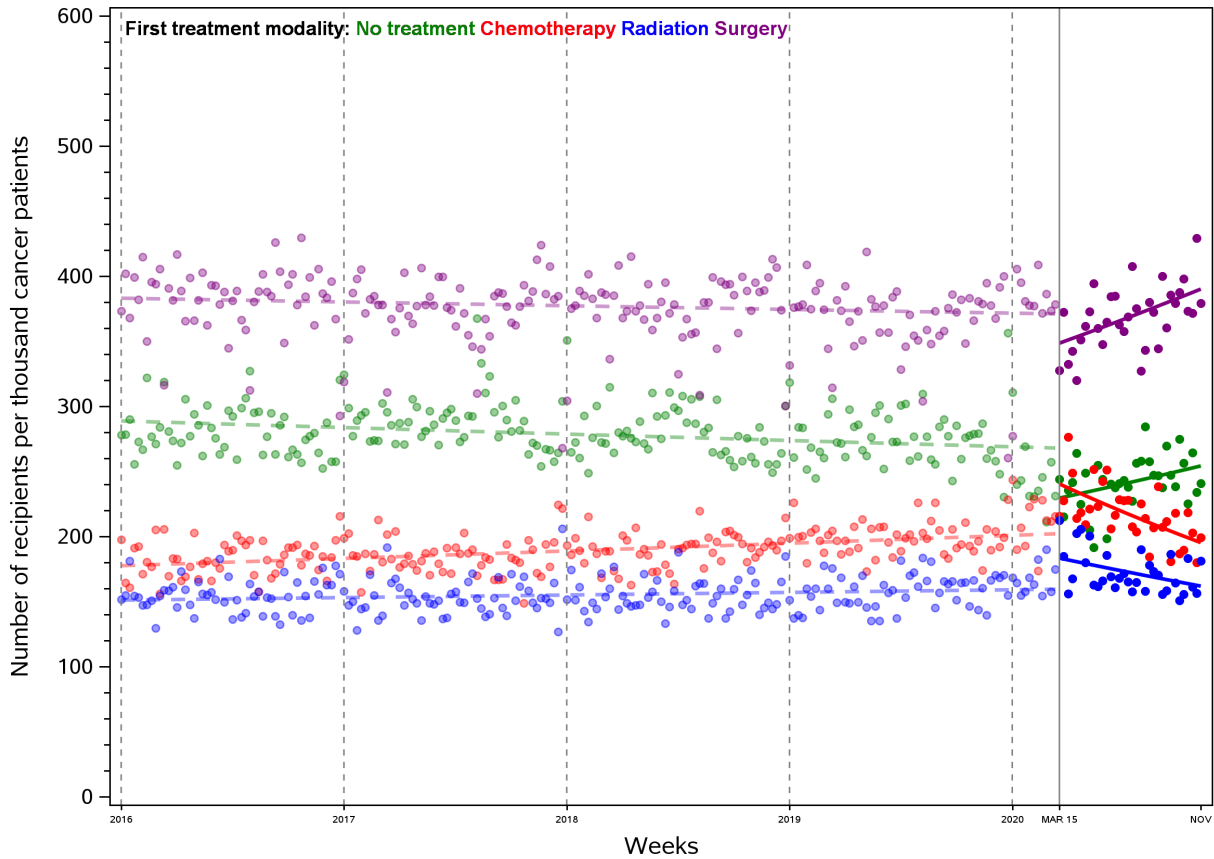

Supplement: open-2022-0102-4-at.pdf [file open-2022-0102-4-at.pdf]
